# Supplementary material for: Comprehensive mapping of cell fates in microsatellite unstable cancer cells support dual targe6ng of WRN and ATR
Source: PubMed Central journal article supplement — bioRxiv. 2023 Jul 30:2023.07.28.550976. Preprint. [Version 1] doi: 10.1101/2023.07.28.550976 (PMC10473727; doi:10.1101/2023.07.28.550976), 2023-07-30

A

*WRN* gene (Chr 18)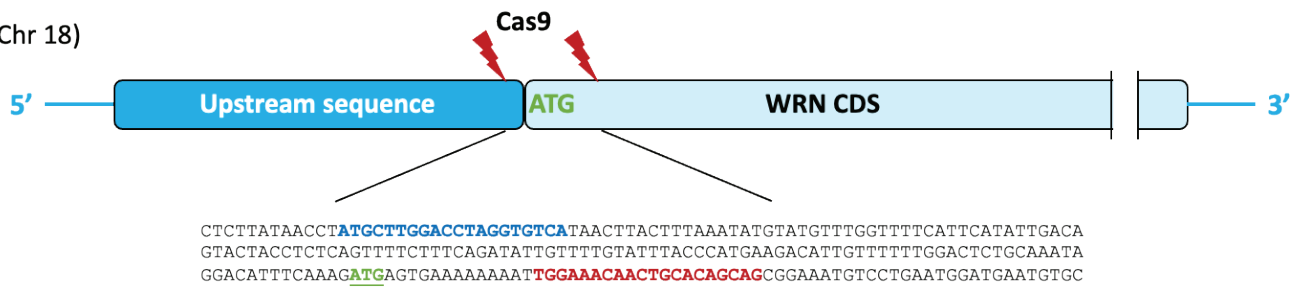

B

**(i) homozygous knock-in of *FKBP-WRN***

RKO c11, KM12 c2, HCT116 c9

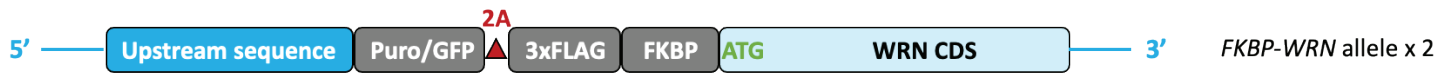**(ii) heterozygous knock-in of *FKBP-WRN***

RKO c16, KM12 c5, OVCAR8 c2, OVCAR8 c8

HCT116 c8

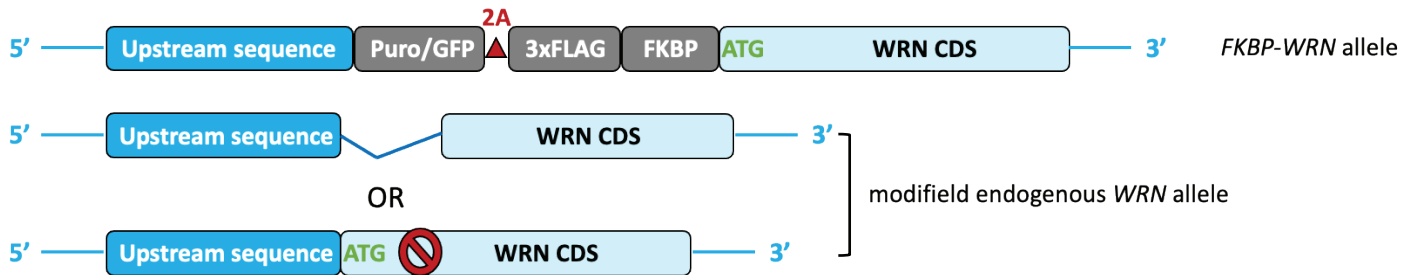

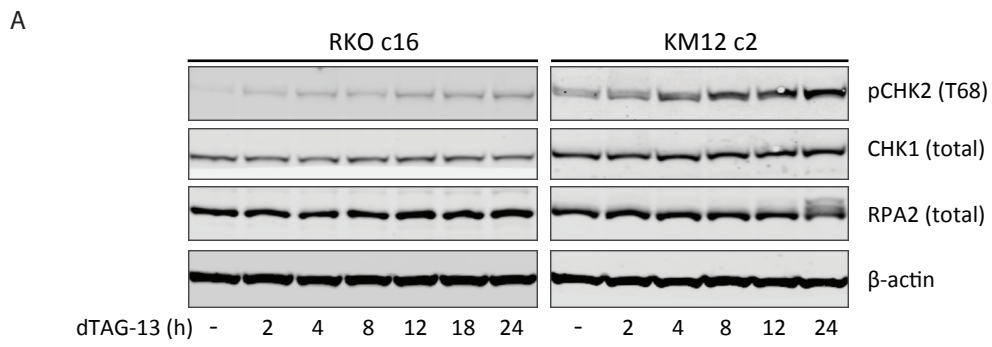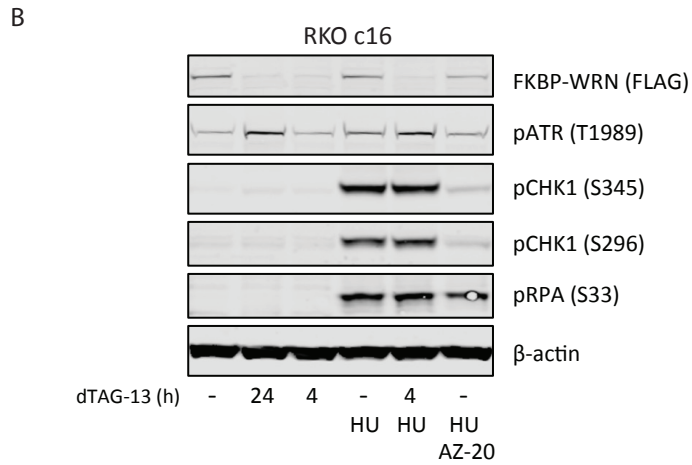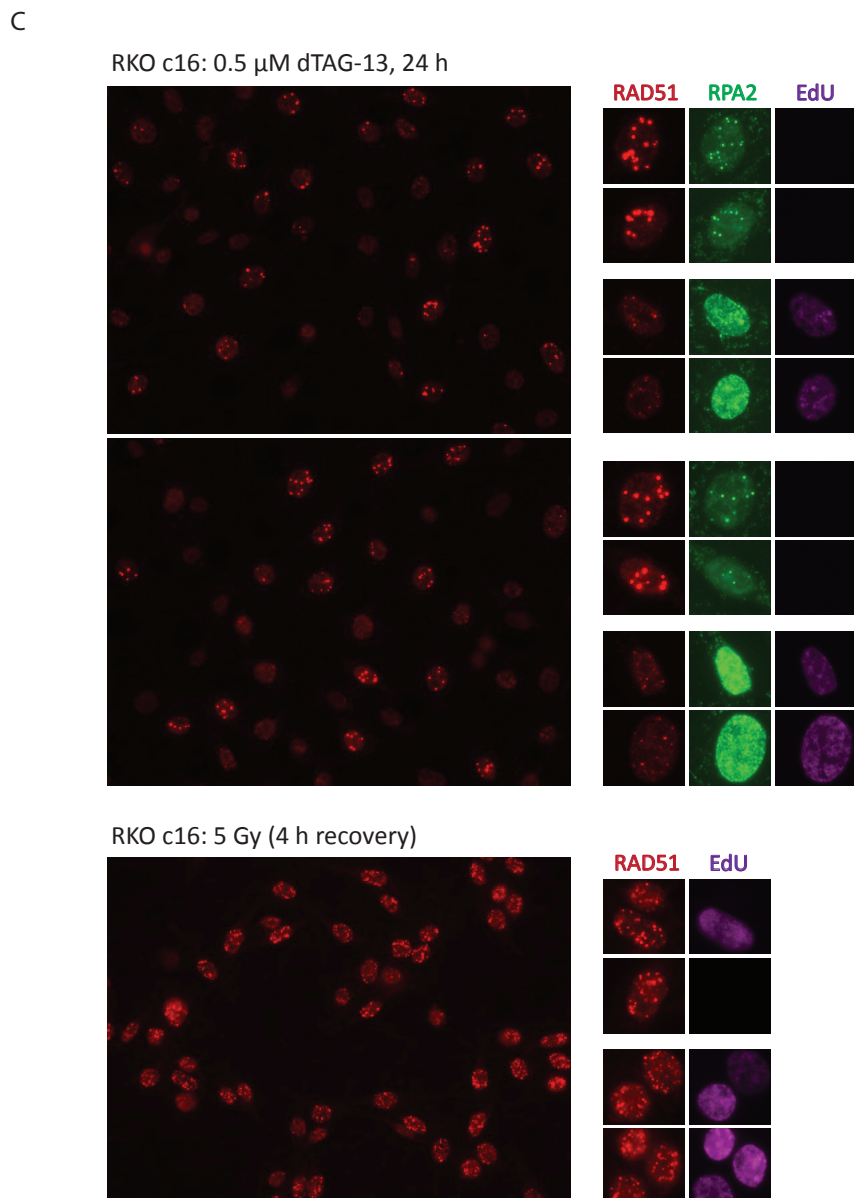

A

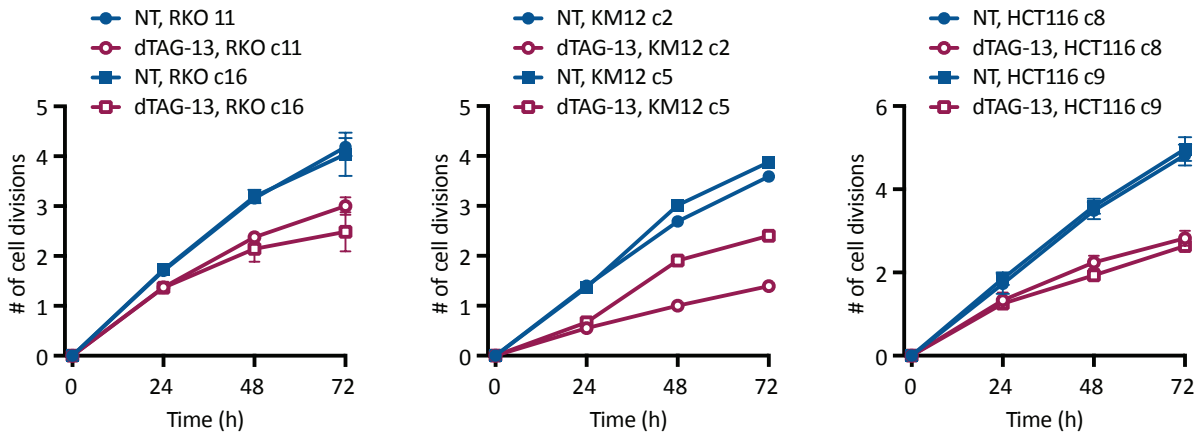

B

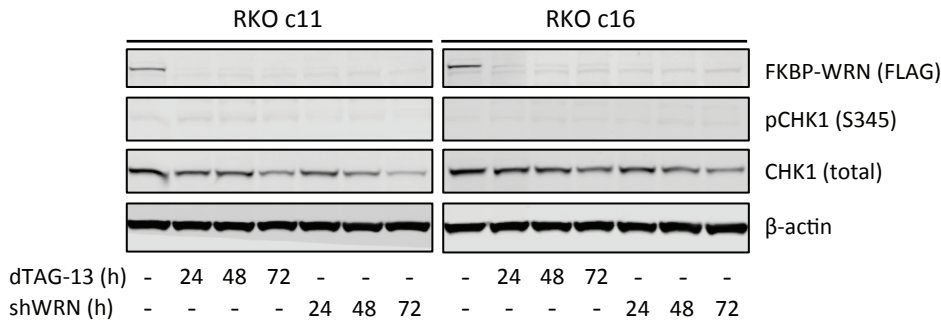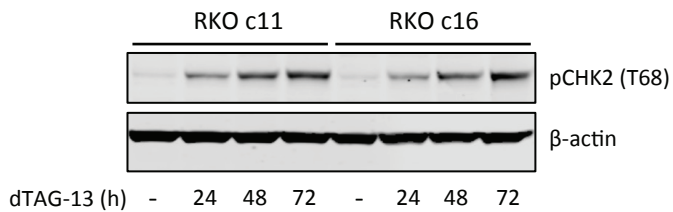

C

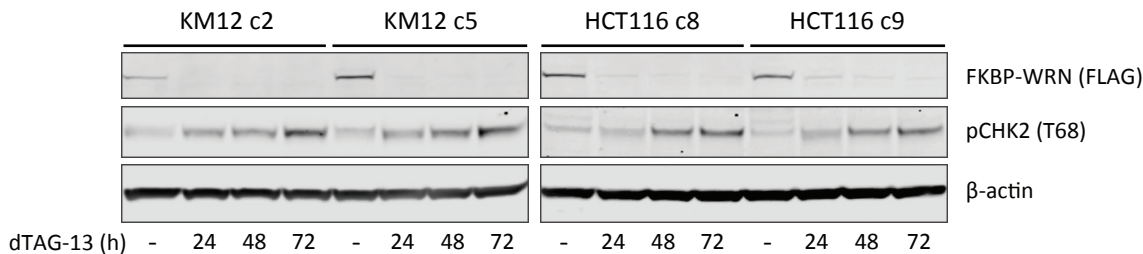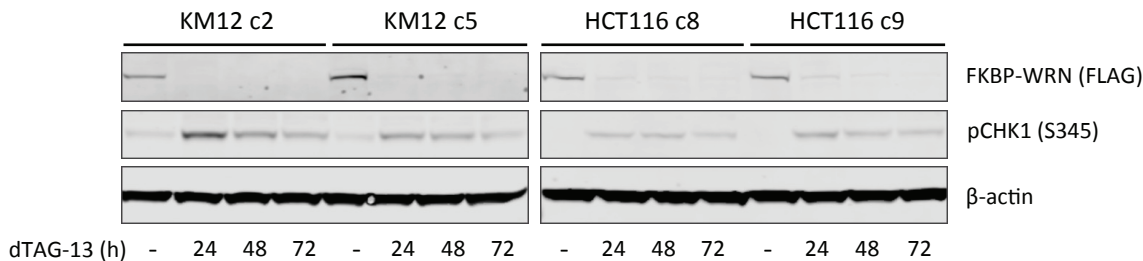

A

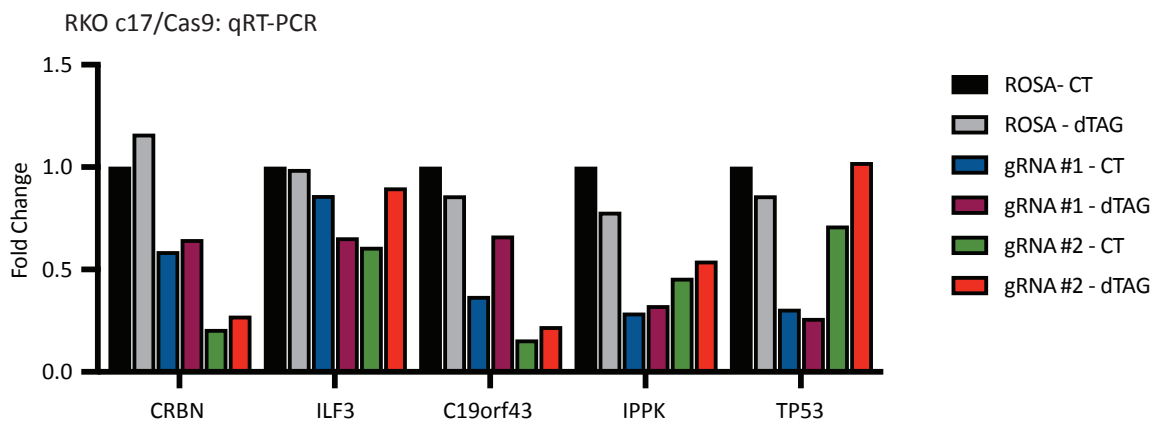

B

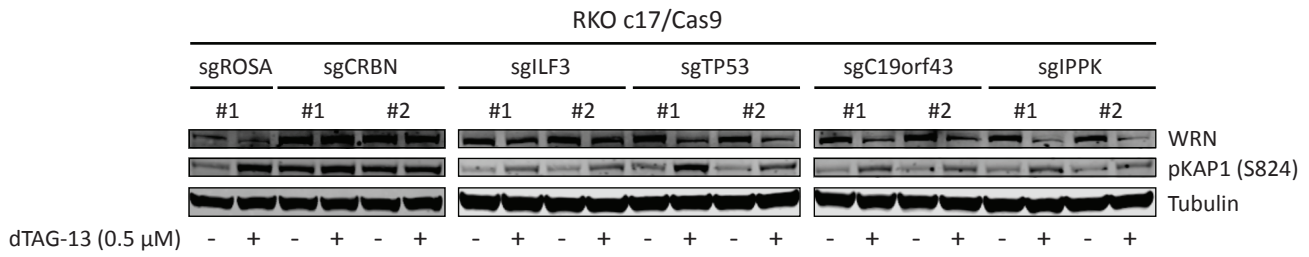

C

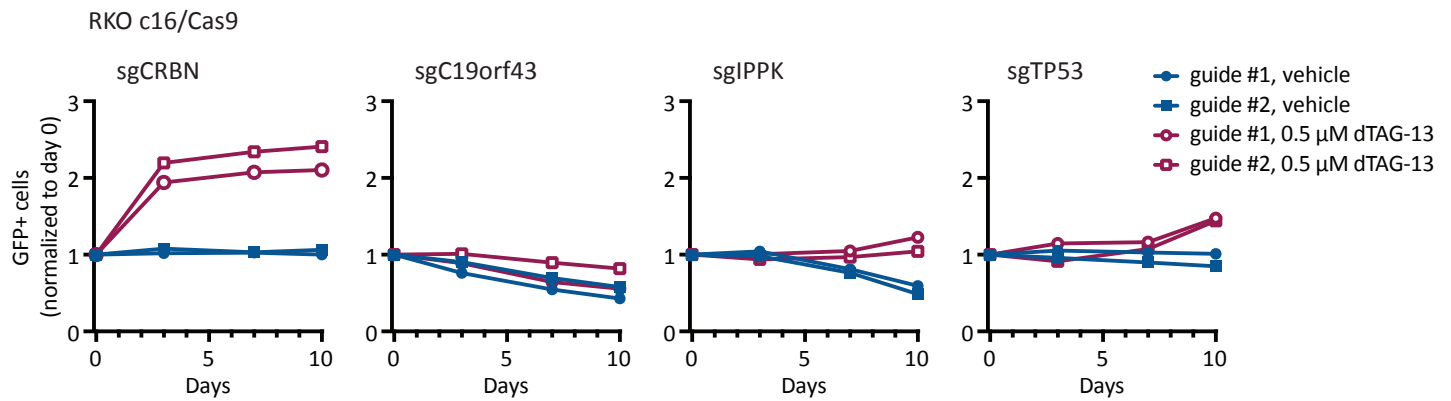

D

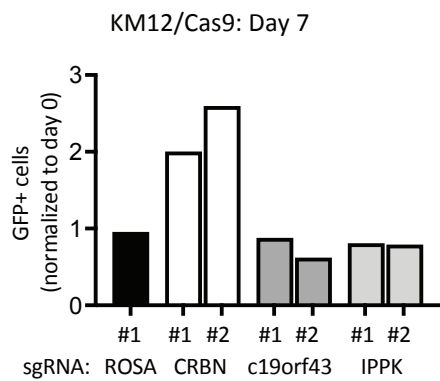



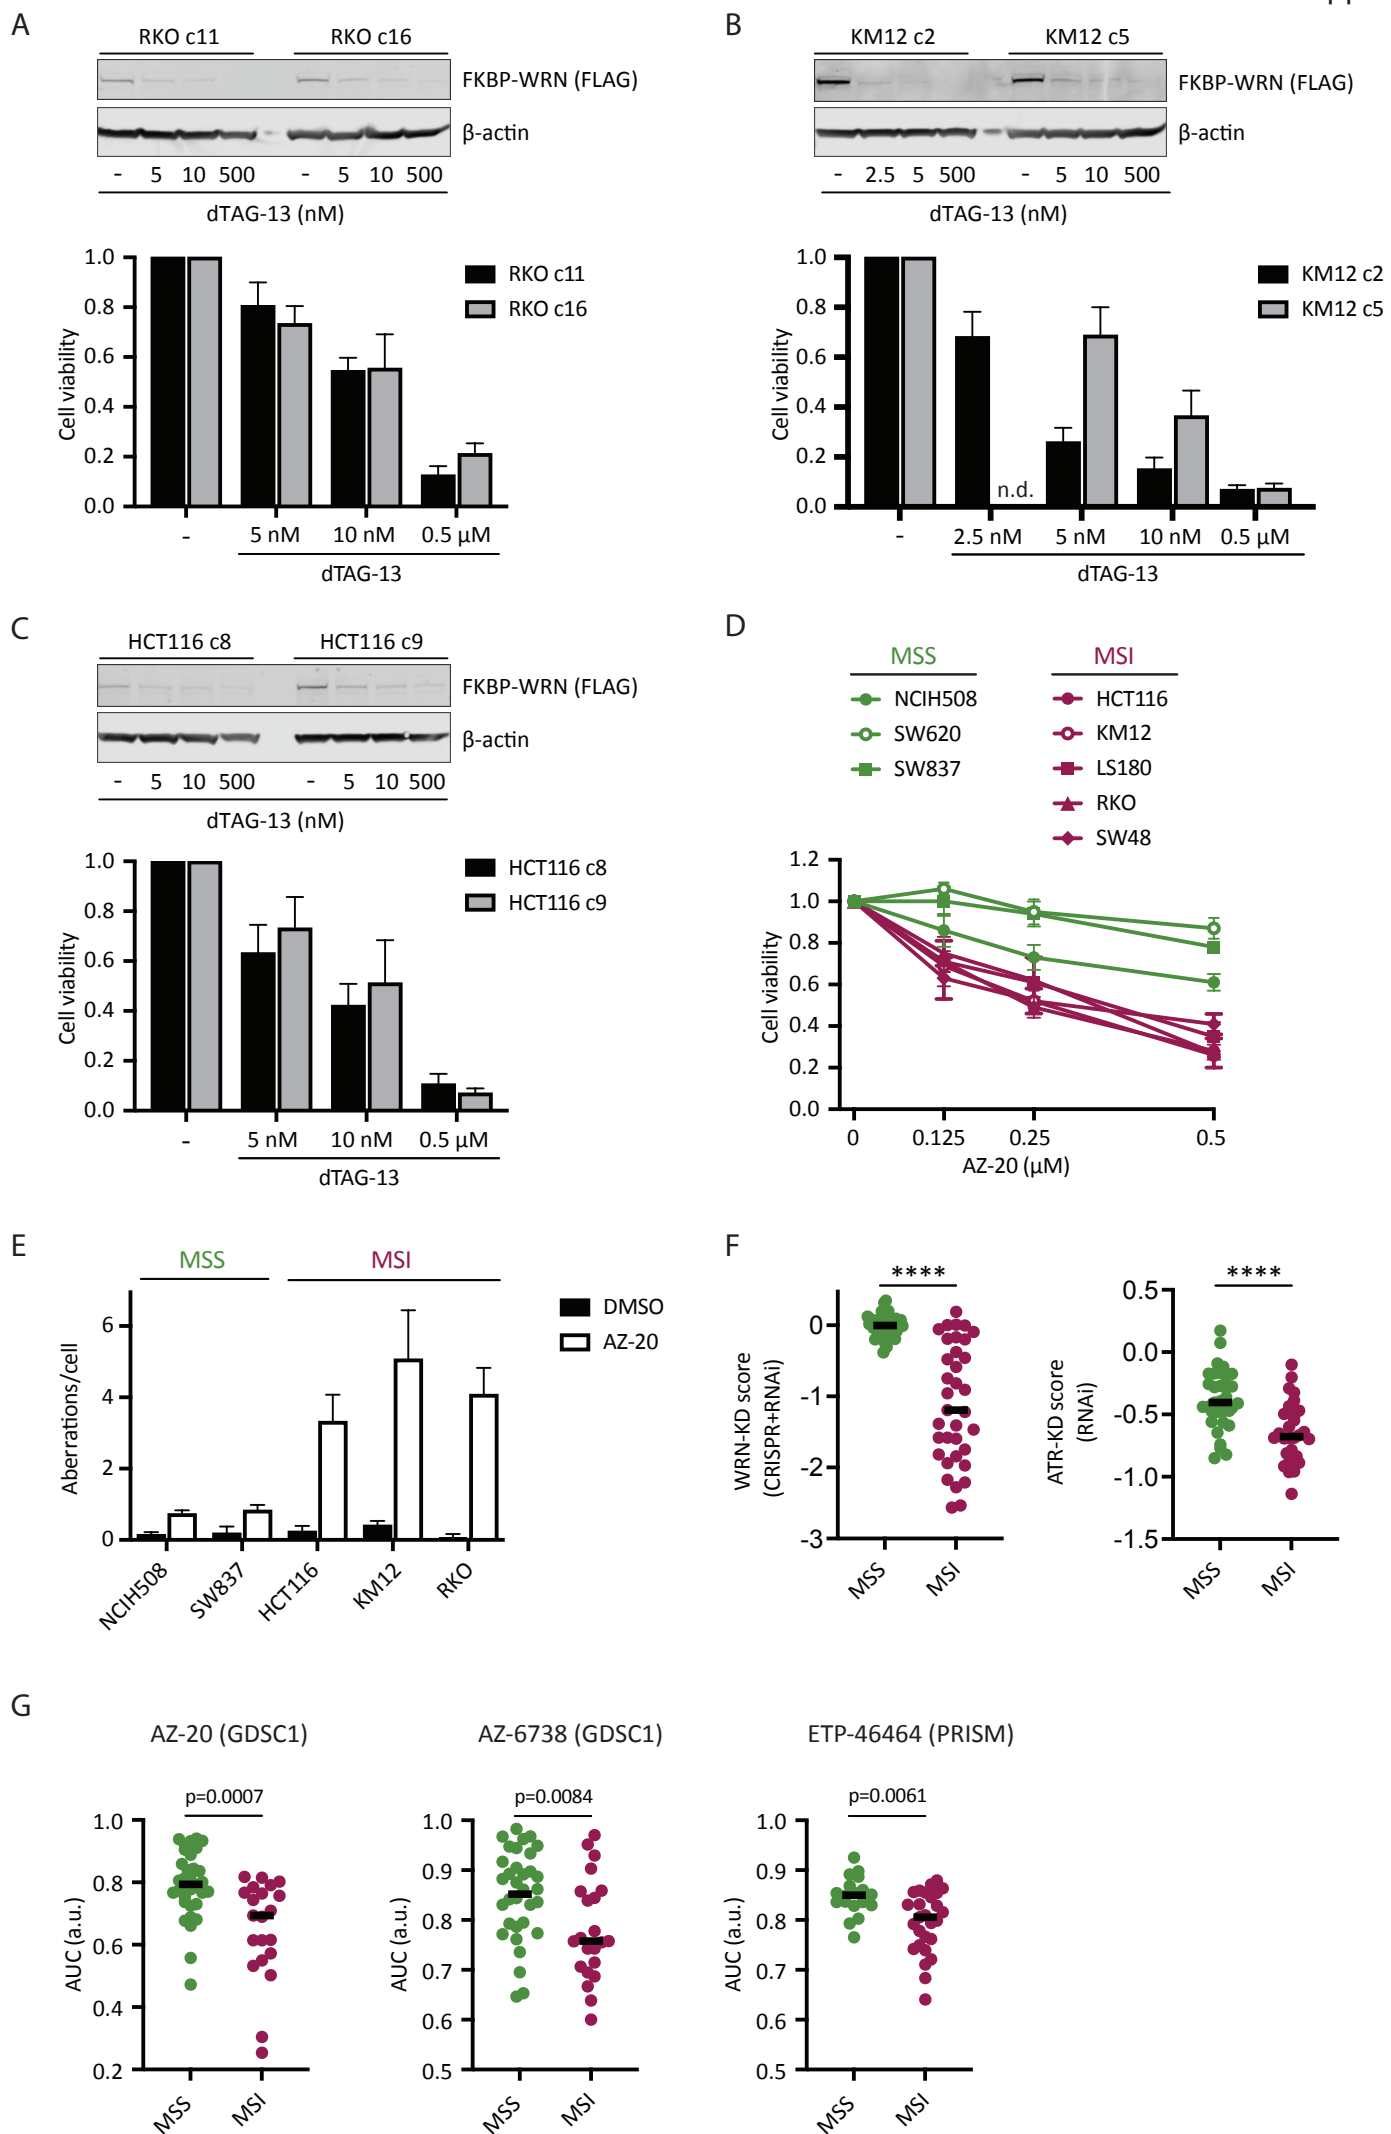

A

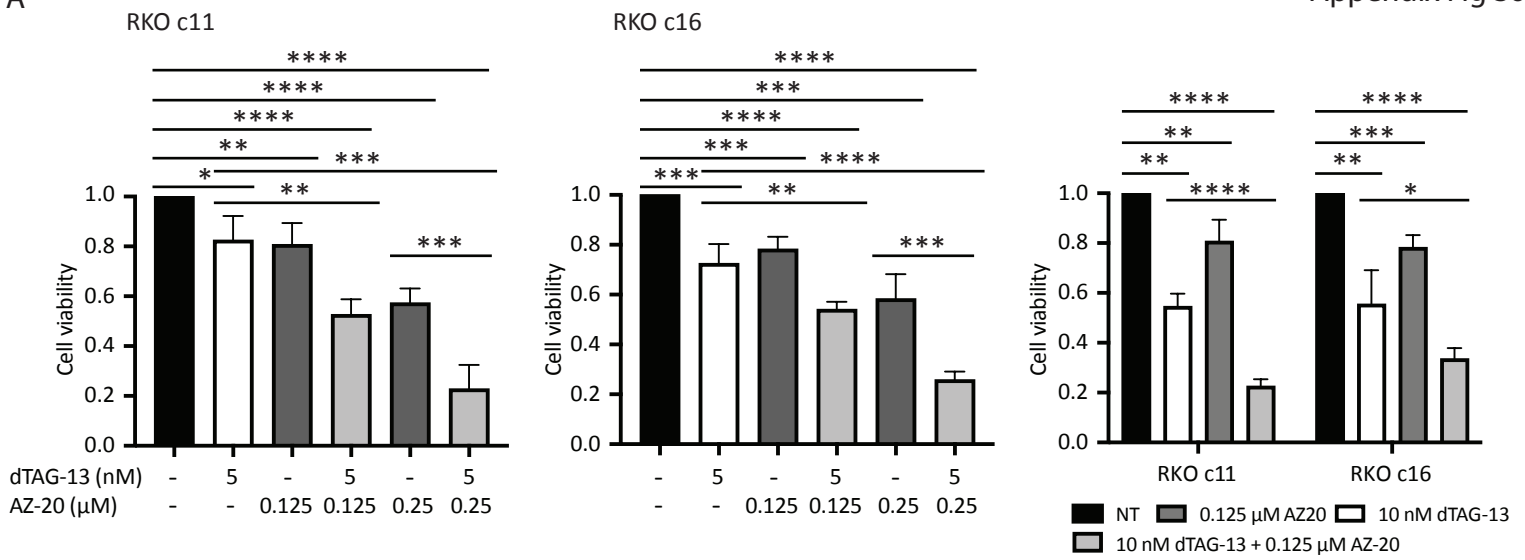

B

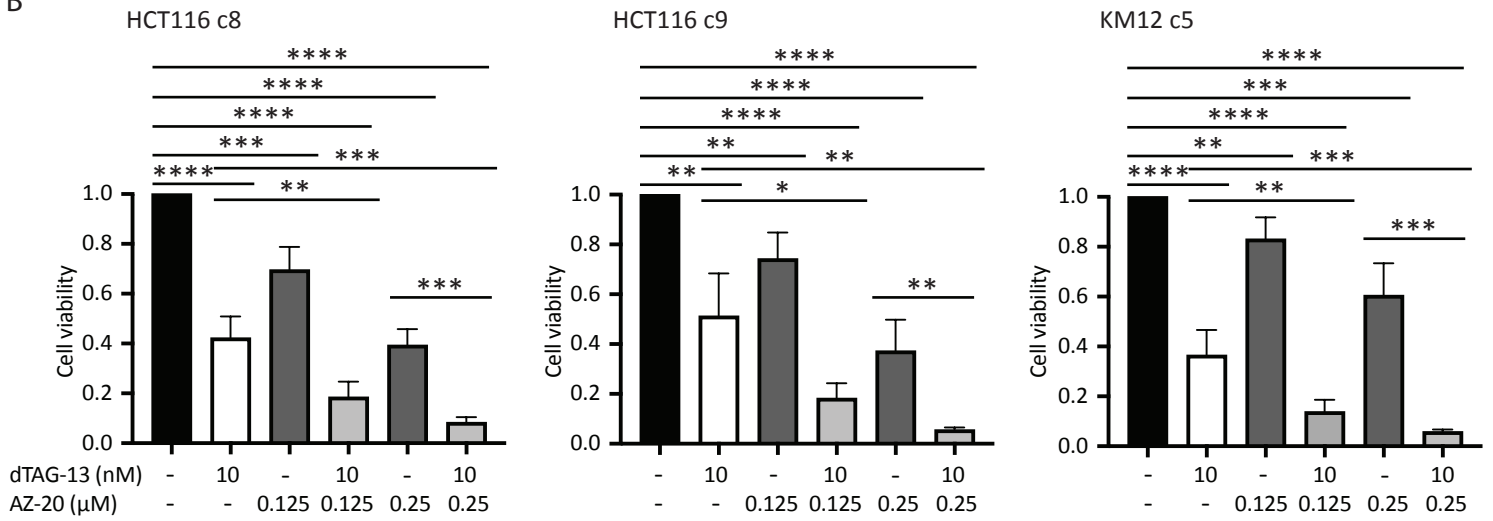

C

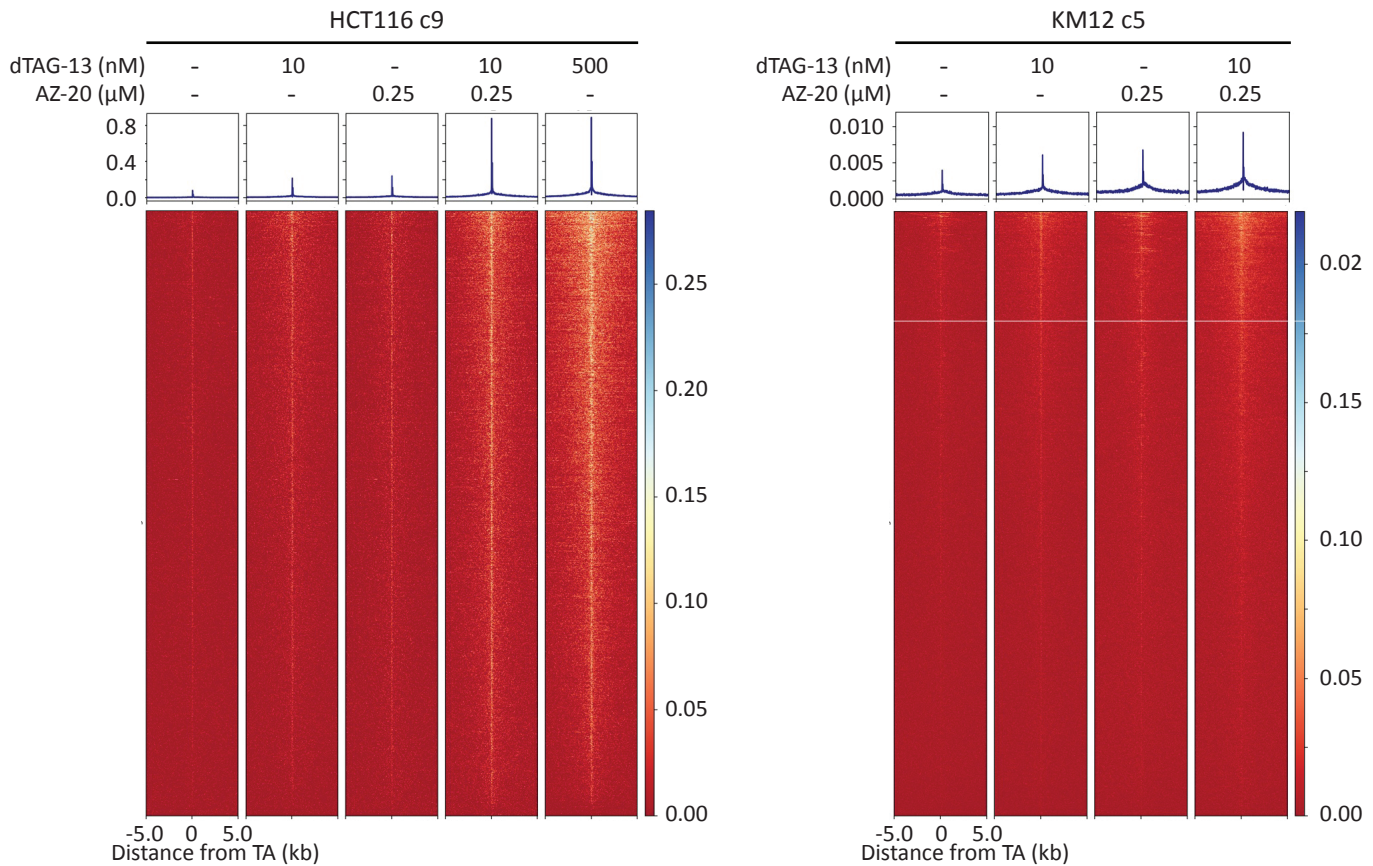

Supplement: media-1.pdf [file media-1.pdf]
